# Supplementary material
Source: PubMed Central journal article supplement (PMC3457114)
Supplement: AEM.01430-12_zam999103750so1.pdf [file AEM.01430-12_zam999103750so1.pdf]

**Table S1.** Physicochemical parameters measured at field sites on both sampling dates.

| Site                  | Date    | Physicochemical Parameters |              |     |                 |                                         |
|-----------------------|---------|----------------------------|--------------|-----|-----------------|-----------------------------------------|
|                       |         | Water Temp (°C)            | Salinity (‰) | pH  | Turbidity (NTU) | DO <sup>a</sup> (mg × L <sup>-1</sup> ) |
| Bahia Beach           | 9/2/10  | 28.4                       | 24.0         | 8.3 | 5.3             | 7.7                                     |
|                       | 9/15/10 | 28.1                       | 25.0         | 8.2 | 5.3             | 6.8                                     |
| Fort DeSoto           | 9/2/10  | 29.2                       | 32.0         | 8.3 | 10.2            | 5.6                                     |
|                       | 9/15/10 | 30.2                       | 34.0         | 8.1 | 6.9             | 9.9                                     |
| Green Swamp           | 9/1/10  | 27.3                       | 0.1          | 7.7 | 0.7             | 5.6                                     |
|                       | 9/16/10 | 25.9                       | 0.4          | 6.9 | 1.5             | 6.5                                     |
| Lake Carroll          | 9/1/10  | 28.6                       | 0.1          | 8.0 | 0.8             | 7.1                                     |
|                       | 9/16/10 | 30.1                       | 0.1          | 7.5 | 1.4             | 8.3                                     |
| Hillsborough<br>River | 9/2/10  | 26.1                       | 0.1          | 8.0 | 1.1             | 3.6                                     |
|                       | 9/16/10 | 27.4                       | 0.2          | 7.1 | 0.7             | 4.6                                     |

<sup>a</sup>DO, dissolved oxygen
